# Supplementary material for: Mycotoxins in Tea ((Camellia sinensis (L.) Kuntze)): Contamination and Dietary Exposure Profiling in the Chinese Population
Source: MDPI journal article supplement (doi:10.3390/toxins14070452), 2022-07-01
Supplement: s1 [file s1]

# Supplementary Materials: Mycotoxins in Tea ((*Camellia sinensis* (L.) Kuntze)): Contamination and Dietary Exposure Profiling in the Chinese Population

Haiyan Zhou, Zheng Yan, Aibo Wu, and Na Liu\*

**Table S1.** Average dietary consumption of tea by persons in different area and their average body weight.

| Area     | N<br>(person) | Bw<br>(kg) | CA<br>(g·day <sup>-1</sup> ) | Tea Categories                                                                                   |
|----------|---------------|------------|------------------------------|--------------------------------------------------------------------------------------------------|
| Mongolia | 99            | 67.60      | 3.70                         | <b>Dark tea</b> , green tea, black tea, oolong tea, and others. (Ye et al.)                      |
| Kunming  | 109           | 60.00      | 3.47/1.50                    | <b>Pu-erh fermented tea/raw tea</b> , green tea, black tea, oolong tea, and others. (Cao et al.) |
| Pu'er    | 110           | 62.80      | 4.39/4.64                    |                                                                                                  |
| Harbin   | 57555         | 59.69      | 4.20                         | <b>Green tea</b> , black tea, oolong tea, and others. (Chen et al. and Guan et al.)              |
| Qingdao  | 35509         |            | 4.10                         |                                                                                                  |
| Suzhou   | 53260         |            | 4.10                         |                                                                                                  |
| Liuzhou  | 50173         |            | 4.10                         |                                                                                                  |
| Haikou   | 29689         |            | 4.20                         |                                                                                                  |
| Henan    | 63357         |            | 4.10                         |                                                                                                  |
| Gansu    | 50041         |            | 4.10                         |                                                                                                  |
| Sichuan  | 55687         |            | 4.10                         |                                                                                                  |
| Zhejiang | 57704         |            | 4.00                         |                                                                                                  |
| Hunan    | 59916         |            | 4.10                         |                                                                                                  |

**Table S2.** Concentration range and mean of mycotoxins calculated with upper bound in all tea samples ( $\mu\text{g}\cdot\text{kg}^{-1}$ ).

| Mycotoxin        | MRLs             | Green Tea (81) |        |                    |       | Oolong Tea (64) |         |                     |        | Black Tea (104) |        |                    |        | Dark Tea (103) |          |                     |         |
|------------------|------------------|----------------|--------|--------------------|-------|-----------------|---------|---------------------|--------|-----------------|--------|--------------------|--------|----------------|----------|---------------------|---------|
|                  |                  | PS             | Max    | Mean               | SD    | PS              | Max     | Mean                | SD     | PS              | Max    | Mean               | SD     | PS             | Max      | Mean                | SD      |
| AFB <sub>1</sub> | 5 <sup>A</sup>   | 0              | 0.13   | 0.03               | 0.02  | 0               | 0.03    | 0.03                | -      | 0               | 0.14   | 0.03               | 0.01   | 0              | 1.11     | 0.06                | 0.14    |
| AFB <sub>2</sub> | NF               | -              | 0.29   | 0.02               | 0.04  | -               | 0.61    | 0.03                | 0.08   | -               | 0.41   | 0.02               | 0.04   | -              | 0.32     | 0.06                | 0.07    |
| AFG <sub>1</sub> | NF               | -              | 0.10   | 0.03               | 0.01  | -               | 2.78    | 0.28                | 0.47   | -               | 15.36  | 0.58               | 2.24   | -              | 4.34     | 0.53                | 0.85    |
| AFG <sub>2</sub> | NF               | -              | 6.75   | 1.21               | 1.32  | -               | 13.36   | 5.81                | 3.69   | -               | 47.08  | 5.33               | 4.89   | -              | 38.10    | 9.93                | 6.51    |
| AFs              | 20 <sup>A</sup>  | 0              | 6.82   | 1.29               | 1.31  | 0               | 14.31   | 6.14                | 3.75   | 2               | 47.15  | 5.96               | 5.53   | 7              | 39.57    | 10.58               | 6.71    |
| ZEN              | 75 <sup>B</sup>  | 0              | 1.75   | 0.17               | 0.20  | 0               | 0.79    | 0.18                | 0.14   | 0               | 5.74   | 0.67               | 1.03   | 0              | 8.41     | 2.10                | 2.57    |
| $\alpha$ -ZEL    | NF               | -              | 24.71  | 17.83              | 4.18  | -               | 48.03   | 23.38               | 12.21  | -               | 116.22 | 24.05              | 21.16  | -              | 99.40    | 19.49               | 19.46   |
| $\beta$ -ZEL     | NF               | -              | 93.55  | 30.84              | 8.84  | -               | 125.70  | 75.32               | 19.92  | -               | 873.37 | 96.35              | 90.71  | -              | 137.39   | 57.34               | 20.08   |
| $\alpha$ -ZAL    | NF               | -              | 0.75   | 0.75               | -     | -               | 12.87   | 0.94                | 1.52   | -               | 0.75   | 0.75               | -      | -              | 14.08    | 1.11                | 1.56    |
| $\beta$ -ZAL     | NF               | -              | 0.75   | 0.75               | -     | -               | 0.75    | 0.75                | -      | -               | 0.75   | 0.75               | -      | -              | 0.75     | 0.75                | -       |
| DON              | 750 <sup>B</sup> | 0              | 120.07 | 15.88 <sup>c</sup> | 21.78 | 6               | 1748.09 | 183.97 <sup>a</sup> | 364.91 | 3               | 985.47 | 84.85 <sup>b</sup> | 196.19 | 6              | 1131.13  | 122.16 <sup>a</sup> | 260.72  |
| 15-Ac DON        | NF               | -              | 38.34  | 16.34              | 4.59  | -               | 15      | 15                  | -      | -               | 748.13 | 56.49              | 121.69 | -              | 736.16   | 84.70               | 137.47  |
| 3-Ac DON         | NF               | -              | 7.5    | 7.08               | 1.39  | -               | 8.03    | 7.42                | 0.52   | -               | 36.56  | 7.78               | 2.85   | -              | 12.77    | 7.61                | 0.62    |
| OTA              | 5 <sup>B</sup>   | 0              | 0.56   | 0.09 <sup>b</sup>  | 0.08  | 0               | 1.06    | 0.33 <sup>b</sup>   | 0.28   | 0               | 4.90   | 1.33 <sup>b</sup>  | 0.96   | 4              | 11354.64 | 129.76 <sup>a</sup> | 1128.93 |
| NEO              | 200 <sup>C</sup> | 0              | 7.27   | 0.99               | 1.08  | 0               | 12.07   | 1.19                | 1.90   | 0               | 45.95  | 1.28               | 4.45   | 0              | 35.68    | 4.98                | 8.38    |
| T-2              | 200 <sup>B</sup> | 0              | 1.46   | 1.45               | 0.18  | 0               | 1.52    | 1.50                | 0.002  | 0               | 16.01  | 1.64               | 1.42   | 0              | 36.88    | 2.57                | 5.52    |
| CIT              | 200 <sup>D</sup> | 0              | 17.46  | 0.93               | 2.84  | 0               | 91.90   | 8.97                | 18.31  | 0               | 93.27  | 6.97               | 16.51  | 1              | 203.76   | 20.87               | 35.27   |

NF: Not Found; MRLs: relevant-Maximum Regulation Limits; PS: positive samples exceeding for MRLs (number).

<sup>A</sup> Limits for AFB<sub>1</sub> and AFs in raw tea materials (TRCU, 2011)

<sup>B</sup> MRLs of contaminants in foods (EC Regulation No 1881/2006).

<sup>C</sup> MRLs with respect to T-2 MRLs (EC Regulation No 1881/2006).

<sup>D</sup> MRLs with respect to the evaluation of citrinin occurrence in Chinese Liupao tea by Li et al.

**Table S3.** The lower bound probabilistic estimation of six groups mycotoxins exposure on four types of tea consumption ( $\mu\text{g}\cdot\text{kg}^{-1}\cdot\text{day}^{-1}$ ).

| Mycotoxins | DONs      | ZENs      | NEO       | OTA       | T-2       | CIT       |
|------------|-----------|-----------|-----------|-----------|-----------|-----------|
| PMTDI      | 1         | 0.25      | 0.1       | 0.0143    | 0.1       | 0.2       |
| Mean       |           |           |           |           |           |           |
| Green Tea  | 9.09 E-04 | 3.41 E-03 | 3.76 E-05 | 2.95 E-06 | 5.64 E-06 | 5.94 E-05 |
| Oolong Tea | 1.11 E-02 | 6.12 E-03 | 3.50 E-04 | 1.28 E-03 | 1.46 E-05 | 2.76 E-03 |
| Black Tea  | 7.67 E-03 | 7.51 E-03 | 3.61 E-05 | 8.27 E-05 | 9.57 E-06 | 4.30 E-04 |
| Dark Tea   | 1.06 E-02 | 4.44 E-03 | 2.48 E-04 | 8.58 E-03 | 6.29 E-05 | 1.15 E-03 |
| P50        |           |           |           |           |           |           |
| Green Tea  | 6.27 E-04 | 3.34 E-03 | 2.59 E-05 | 2.03 E-06 | 3.89 E-06 | 4.09 E-05 |
| Oolong Tea | 7.62 E-03 | 5.79 E-03 | 2.41 E-04 | 8.80 E-04 | 1.01 E-05 | 1.90 E-03 |
| Black Tea  | 5.30 E-03 | 5.80 E-03 | 2.49 E-05 | 6.97 E-05 | 6.60 E-06 | 2.97 E-04 |
| Dark Tea   | 7.31 E-03 | 4.00 E-03 | 1.71 E-04 | 1.57 E-07 | 4.34 E-05 | 7.94 E-04 |
| P95        |           |           |           |           |           |           |
| Green Tea  | 2.75 E-03 | 4.78 E-03 | 1.14 E-04 | 8.90 E-06 | 1.70 E-05 | 1.79 E-04 |
| Oolong Tea | 3.35 E-02 | 9.82 E-03 | 1.06 E-03 | 3.87 E-03 | 4.43 E-05 | 8.34 E-03 |
| Black Tea  | 2.31 E-02 | 1.82 E-02 | 1.09 E-04 | 2.02 E-04 | 2.88 E-05 | 1.30 E-03 |
| Dark Tea   | 3.19 E-02 | 8.73 E-03 | 7.47 E-04 | 2.13 E-05 | 1.89 E-04 | 3.47 E-03 |

**Table S4.** The middle bound probabilistic estimation of six groups mycotoxins exposure on four types of tea consumption ( $\mu\text{g}\cdot\text{kg}^{-1}\cdot\text{day}^{-1}$ ).

| Mycotoxins | DONs      | ZENs      | NEO       | OTA       | T-2       | CIT       |
|------------|-----------|-----------|-----------|-----------|-----------|-----------|
| PMTDI      | 1         | 0.25      | 0.1       | 0.0143    | 0.1       | 0.2       |
| Mean       |           |           |           |           |           |           |
| Green Tea  | 1.39 E-03 | 3.46 E-03 | 3.79 E-05 | 4.34 E-06 | 5.16 E-05 | 5.14 E-06 |
| Oolong Tea | 7.92 E-02 | 6.16 E-03 | 3.19 E-05 | 1.94 E-05 | 4.76 E-05 | 5.52 E-04 |
| Black Tea  | 2.64 E-03 | 7.58 E-03 | 2.76 E-05 | 8.29 E-05 | 4.85 E-05 | 8.08 E-03 |
| Dark Tea   | 1.39 E-02 | 2.67 E-02 | 2.63 E-04 | 1.72 E-04 | 4.94 E-05 | 1.15 E-03 |
| P50        |           |           |           |           |           |           |
| Green Tea  | 1.19 E-03 | 3.39 E-03 | 3.03 E-05 | 3.55 E-06 | 5.16 E-05 | 3.14 E-06 |
| Oolong Tea | 1.37 E-03 | 5.83 E-03 | 2.82 E-05 | 1.41 E-05 | 4.74 E-05 | 3.81 E-04 |
| Black Tea  | 1.38 E-03 | 5.83 E-03 | 2.61 E-05 | 6.83 E-05 | 4.80 E-05 | 6.02 E-06 |
| Dark Tea   | 1.52 E-03 | 3.96 E-03 | 3.87 E-05 | 1.56 E-05 | 4.65 E-05 | 7.95 E-04 |
| P95        |           |           |           |           |           |           |
| Green Tea  | 2.30 E-03 | 4.83 E-03 | 8.23 E-05 | 9.94 E-06 | 5.62 E-05 | 1.26 E-05 |
| Oolong Tea | 2.04 E-02 | 9.84 E-03 | 5.17 E-05 | 5.39 E-05 | 4.86 E-05 | 1.67 E-03 |
| Black Tea  | 6.12 E-03 | 1.83 E-02 | 3.67 E-05 | 2.05 E-04 | 5.14 E-05 | 2.88 E-04 |
| Dark Tea   | 1.52 E-02 | 9.30 E-03 | 1.07 E-03 | 5.66 E-04 | 6.60 E-05 | 3.47 E-03 |

**Table S5.** The upper bound probabilistic estimation of carcinogenic risk (R) of AFG<sub>2</sub> through dark tea consumption in different regions.

| Groups | Ulan Bator of Mongolia |           |           | Kunming   |           |           | Pu'er     |           |           |
|--------|------------------------|-----------|-----------|-----------|-----------|-----------|-----------|-----------|-----------|
|        | Mean                   | P50       | P95       | Mean      | P50       | P95       | Mean      | P50       | P95       |
| Male   | 6.17 E-06              | 5.65 E-06 | 1.35 E-05 | 2.80 E-06 | 2.56 E-06 | 5.06 E-06 | 7.43 E-06 | 6.79 E-06 | 1.34 E-05 |
| Female | 3.33 E-06              | 3.05 E-06 | 7.27 E-06 | 5.03 E-06 | 4.60 E-06 | 9.09 E-06 | 4.02 E-06 | 3.68 E-06 | 7.26 E-06 |
| 30-39  | 3.46 E-06              | 3.16 E-06 | 7.54 E-06 | 4.84 E-06 | 4.43 E-06 | 8.74 E-06 | 6.27 E-06 | 5.73 E-06 | 1.13 E-05 |
| 40-49  | 3.24 E-06              | 2.97 E-06 | 7.08 E-06 | 2.78 E-06 | 2.54 E-06 | 5.02 E-06 | 3.65 E-06 | 3.34 E-06 | 6.60 E-06 |
| ≥50    | 6.97 E-06              | 6.38 E-06 | 1.52 E-05 | 4.82 E-06 | 4.41 E-06 | 8.71 E-06 | 1.01 E-05 | 9.21 E-06 | 1.82 E-05 |

The bold fonts represent  $R > 1.0 \text{ E-}05$ .

**Table S6.** The deterministic estimation of mycotoxins exposure on green tea powder consumption ( $\mu\text{g}\cdot\text{kg}^{-1}\cdot\text{day}^{-1}$ ).

| Mycotoxins | Lower Bound | Middle Bound | Upper Bound |
|------------|-------------|--------------|-------------|
| DONs       | 2.08E-04    | 4.10E-04     | 6.11E-04    |
| ZENs       | 7.58E-04    | 7.70E-04     | 7.83E-04    |
| NEO        | 8.60E-06    | 1.20E-05     | 1.54E-05    |
| OTA        | 6.74E-07    | 1.02E-06     | 1.37E-06    |
| T-2        | 1.29E-06    | 1.19E-05     | 2.26E-05    |
| CIT        | 1.36E-05    | 1.40E-05     | 1.44E-05    |
| AFs        | 1.90E-05    | 1.96E-05     | 2.01E-05    |

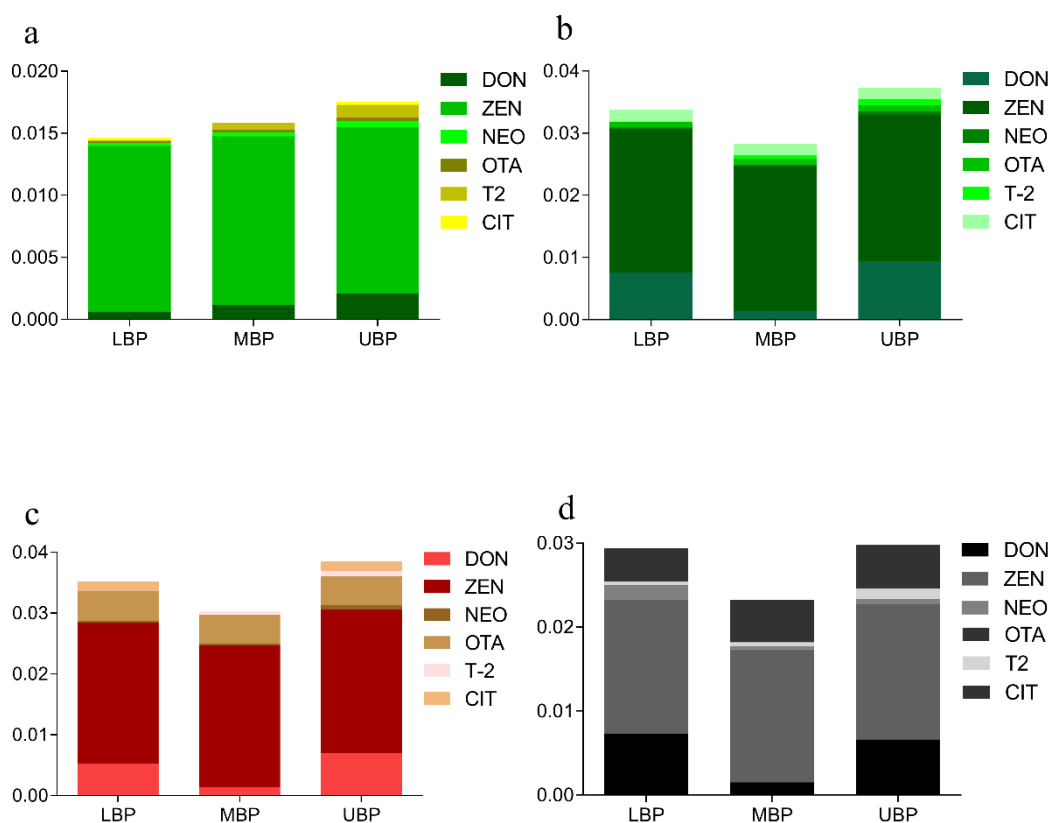

**Figure S1.** The (HI) values of six non-carcinogenic mycotoxins from tea consumption are the sum of MOS values (P50) from probabilistic estimation with three bounds: a) green tea, b) oolong tea, c) black tea, d) dark tea.
